# Supplementary material for: Layered titanium phosphate nanosheets with water in salt electrolyte toward high-voltage aqueous full lithium-ion batteries
Source: Royal Society of Chemistry journal article supplement (doi:10.1039/d4nj00297k), 2024-01-01
Supplement: d4nj00297k1.pdf [file d4nj00297k1.pdf]

## Supplementary Information

### Equations

The following equation 1 and equation 2 are used for the ratio of diffusion-controlled and capacitive contribution:

$$i = av^b \quad (1)$$

$$i(V) = k_1v + k_2v^{1/2} \quad (2)$$

By rewriting the above equations and simplifying them, we get the follow equations:

$$\log(i) = b\log(v) + \log(a) \quad (3)$$

$$i(V)/v^{1/2} = k_1v^{1/2} + k_2 \quad (4)$$

The equation (3), in which  $i$  represents the peak current,  $v$  represents the scan rate, and  $a$  and  $b$  represent the adjustable parameters, can be used to determine the  $\text{Li}^+$ -diffusion lithiation type instead of pseudocapacitive behavior. In equation(4),  $v$ ,  $i$ ,  $k_1v$ , and  $k_2v^{1/2}$  represent scan rate, current, and contributions of capacitive and diffusion-controlled behavior, respectively. The values of  $k_1$  and  $k_2$  can be quantified as the contributions of capacitive and diffusion-controlled behaviors.

The diffusion coefficient computational formula is as follows:

$$D^{GITT} = \frac{4}{\pi\tau} \left( \frac{m_B V_M}{M_B S} \right)^2 \left( \frac{\Delta E_s}{\Delta E_t} \right)^2$$

where  $\tau$  is the time for a corresponding galvanostatic current;  $m_B$ ,  $M_B$ , and  $V_M$  are the mass, molecular weight, and molar volume of THP, respectively;  $S$  is the electrode–electrolyte interface area (taken as the geometric area of the electrode);  $\Delta E_s$  and  $\Delta E_t$  are the voltage difference in one relaxation time and the voltage difference during one current pulse, respectively.

## Supporting Figures and Tables

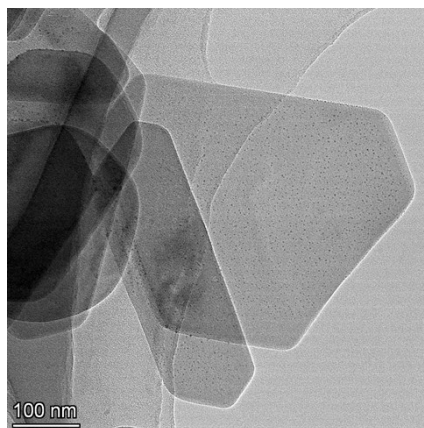

**Fig. S1** TEM images of the THP.

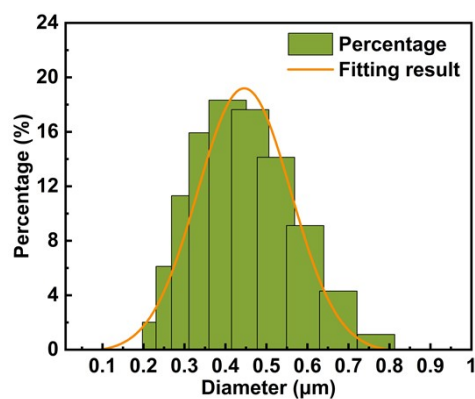

**Fig. S2** The granularity distribution and average diameter of particles of synthesized THP.

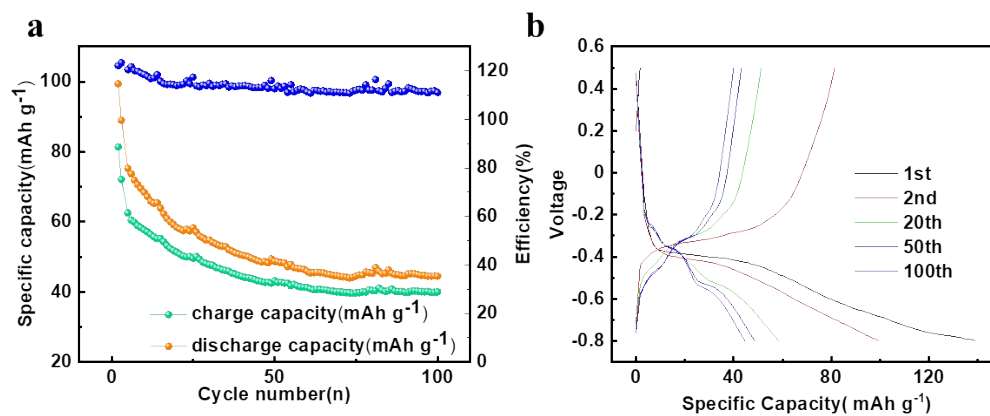

**Fig. S3** (a) The cycle performance of THP electrode at a current density of 0.1 A g<sup>-1</sup>

and (b) the 1st, 2nd, 20th, 50th and 100th charge/discharge curves in a voltage range of -0.8 to 0.5 V vs. Ag/AgCl.

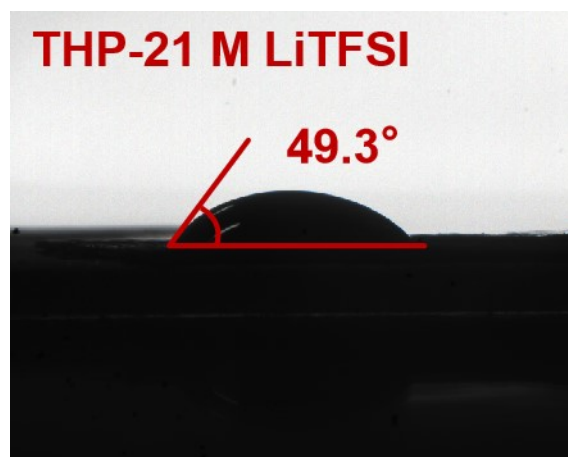

**Fig. S4** Contact angle measurement of THP electrode with 21 m LiTFSI electrolyte.

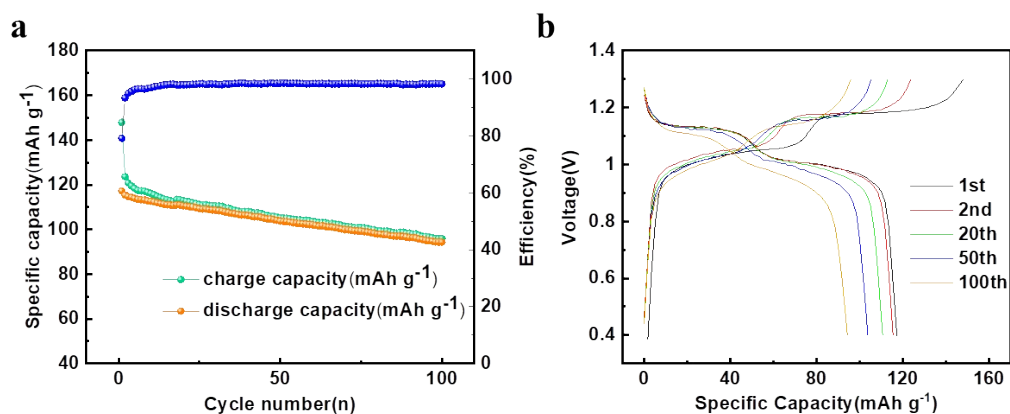

**Fig. S5** (a) The cycle performance of LMO electrode at a current density of 0.1 A g<sup>-1</sup> and (b) the 1st, 2nd, 20th, 50th and 100th charge/discharge curves in a voltage range of 0.4 to 1.3 V vs. Ag/AgCl.

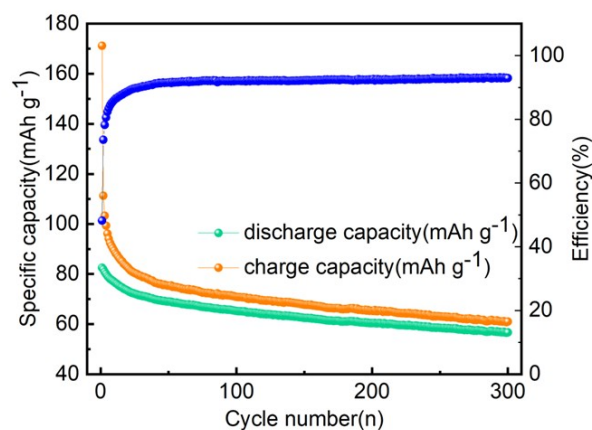

**Fig. S6** Long-term cycle performance of LMO//1 m LiTFSI//THP full cell electrode at 0.05 A g<sup>-1</sup>.

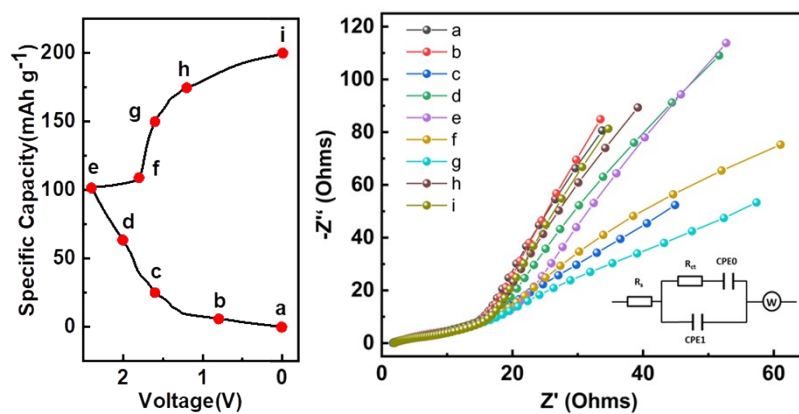

**Fig. S7** ex situ impedance spectra of THP//LMO at different voltage during charging and discharging process between 100 kHz and 0.01 Hz in different cycles at 0.05 Ag<sup>-1</sup>. The states measured by ex situ impedance spectra (right) are represented by the marked dots (a to i) in the GCD curves (left).

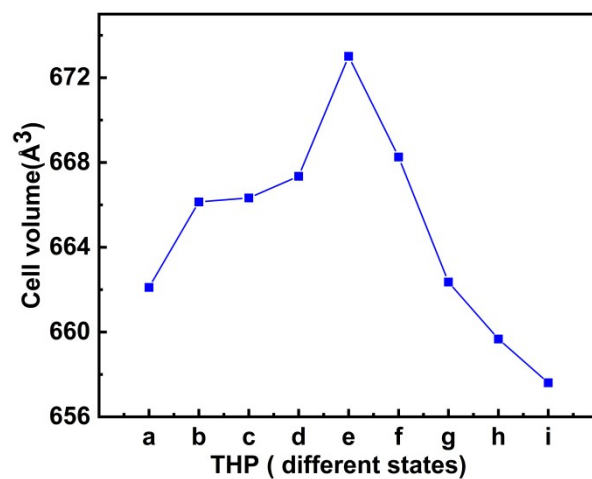

**Fig. S8** The corresponding cell volume change of the anode during charging and discharging at different states ( $\text{Li}^+$  insertion/extraction).

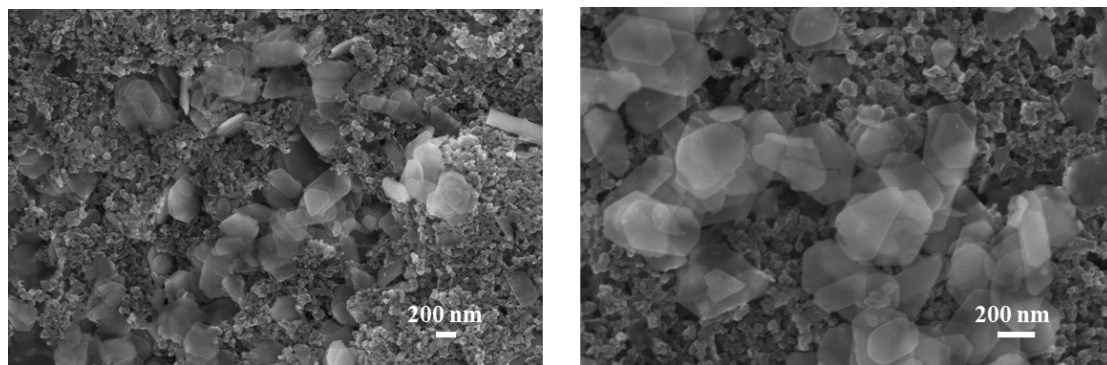

**Fig. S9** SEM images of THP anode after 100 cycles.

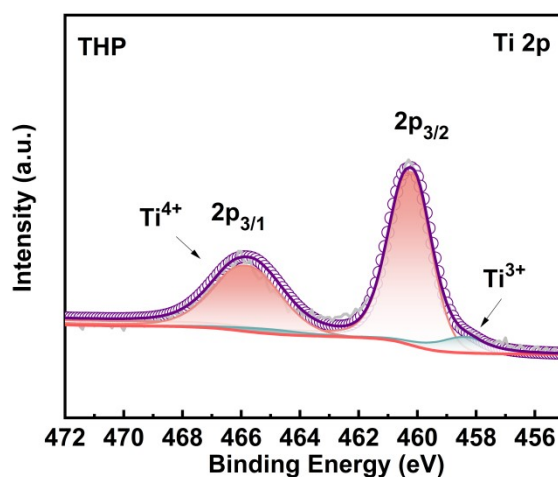

**Fig. S10** Ti 2p XPS spectra of pristine THP sample.

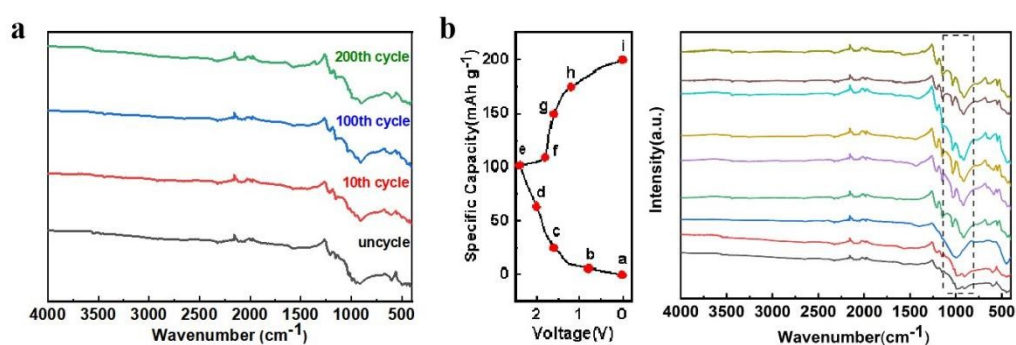

**Fig.11** (a) FT-IR spectra of THP electrode after different cycles. (b) The ex situ FT-IR patterns of THP in the full ARLB at different states; the cells were first cycled for 15 cycles then charged/discharged to the desired states at  $0.05 \text{ A g}^{-1}$ .

**Table S1** the simulation results of Rct and Zw

| Sample                           | a    | b    | c    | d    | e    | f    | g    | h    | i    |
|----------------------------------|------|------|------|------|------|------|------|------|------|
| <b>Rct (<math>\Omega</math>)</b> | 7.96 | 7.73 | 7.40 | 8.29 | 11.8 | 21.4 | 6.95 | 7.73 | 8.89 |
| <b>ZW(DW)</b>                    | 19.2 | 19.9 | 29.7 | 33.0 | 34.9 | 21.5 | 42.0 | 26.1 | 19.4 |

**Table S2** various rechargeable aqueous lithium battery

| Cell Type                                                                                                        | Electrolyte                                       | electrochemical window | Initial Capacity (mAh g <sup>-1</sup> ) | Capacity retention (%)               | Ref.      |
|------------------------------------------------------------------------------------------------------------------|---------------------------------------------------|------------------------|-----------------------------------------|--------------------------------------|-----------|
| LiMn <sub>2</sub> O <sub>4</sub>   LiV <sub>3</sub> O <sub>8</sub> nanowires                                     | saturated LiNO <sub>3</sub>                       | 0.5-1.5 V              | 103.9 mAh g <sup>-1</sup>               | 83 %(100)at 0.15 A g <sup>-1</sup>   | 1         |
| LiMn <sub>2</sub> O <sub>4</sub>   TiS <sub>2</sub>                                                              | 21 M LiTFSI                                       | 0.7-2.2V               | 58 mAh g <sup>-1</sup>                  | 74 %(50) at 1 C                      | 2         |
| LiMn <sub>2</sub> O <sub>4</sub>   VO <sub>2</sub> (D)                                                           | 2 M Li <sub>2</sub> SO <sub>4</sub>               | 0.2-1.8 V              | 97.4 mAh g <sup>-1</sup>                | 35 %(1000)at 0.1 A g <sup>-1</sup>   | 3         |
| LiMn <sub>2</sub> O <sub>4</sub>   (NH <sub>4</sub> ) <sub>2</sub> V <sub>7</sub> O <sub>16</sub>                | 2 M Li <sub>2</sub> SO <sub>4</sub>               | 0.01-1.7 V             | 38.6 mAh g <sup>-1</sup>                | 78 %(500) at 0.3 A g <sup>-1</sup>   | 4         |
| LiMn <sub>2</sub> O <sub>4</sub>   LiTi <sub>2</sub> (PO <sub>4</sub> ) <sub>3</sub> @carbon                     | 2 M Li <sub>2</sub> SO <sub>4</sub>               | 0-1.85 V               | 97 mAh g <sup>-1</sup>                  | 72 %(200) at 0.2 C                   | 5         |
| LiMn <sub>2</sub> O <sub>4</sub>   LiTi <sub>2</sub> (PO <sub>4</sub> ) <sub>3</sub> @graphene                   | 2 M Li <sub>2</sub> SO <sub>4</sub>               | 0-1.85 V               | 107.6 mAh g <sup>-1</sup>               | 88 %(200) at 0.2 C                   | 5         |
| LiMn <sub>2</sub> O <sub>4</sub>   FePO <sub>4</sub> ·2H <sub>2</sub> O                                          | 15 M LiTFSI                                       | 0-1.9 V                | 82 mAh g <sup>-1</sup>                  | 92 %(500) at 0.2 C                   | 6         |
| LiMn <sub>2</sub> O <sub>4</sub>   FePO <sub>4</sub>                                                             | 15 M LiTFSI                                       | 0-1.9 V                | 163 mAh g <sup>-1</sup>                 | 71 %(300) at 0.2 C                   | 6         |
| LiMn <sub>2</sub> O <sub>4</sub>   LiTi <sub>2-x</sub> Sn <sub>x</sub> (PO <sub>4</sub> ) <sub>3</sub> /C        | saturated LiNO <sub>3</sub>                       | 0-1.85 V               | 118 mAh g <sup>-1</sup>                 | 77%(1000) at 10 C                    | 7         |
| LiMn <sub>2</sub> O <sub>4</sub>   PANI                                                                          | saturated LiNO <sub>3</sub>                       | 0.5-1.5 V              | 110.4 mAh g <sup>-1</sup>               | 81%(150) at 0.075 A g <sup>-1</sup>  | 8         |
| LiMn <sub>2</sub> O <sub>4</sub>   C-TiP <sub>2</sub> O <sub>7-y</sub>                                           | 1 M Li <sub>2</sub> SO <sub>4</sub>               | 0.5-1.7 V              | 97 mAh g <sup>-1</sup>                  | 85%(800) at 0.1 A g <sup>-1</sup>    | 9         |
| LiMn <sub>2</sub> O <sub>4</sub>   TiP <sub>2</sub> O <sub>7</sub> /C                                            | 2 M Li <sub>2</sub> SO <sub>4</sub>               | 0-1.85 V               | 98 mAh g <sup>-1</sup>                  | 91%(100) at 0.25 C                   | 10        |
| Li[Co <sub>1/3</sub> Ni <sub>1/3</sub> Mn <sub>1/3</sub> ]O <sub>2</sub>   Li <sub>2</sub> FeSiO <sub>4</sub> /C | 1 M Li <sub>2</sub> SO <sub>4</sub> +<br>1 M LiOH | 0.5-1.55 V             | 89.8 mAh g <sup>-1</sup>                | >90%(30) at 0.01 A g <sup>-1</sup>   | 11        |
| LiMn <sub>2</sub> O <sub>4</sub>   Ti(HPO <sub>4</sub> ) <sub>2</sub> · H <sub>2</sub> O                         | 21 M LiTFSI                                       | 0-2.4 V                | 119 mAh g <sup>-1</sup>                 | 83% ( 500 ) at 0.1 A g <sup>-1</sup> | This work |

## Reference

1. J. Liu, L. Yi, L. Liu and P. Peng, *Mater. Chem. Phys.*, 2015, **161**, 211-218.
2. W.-X. Song, H.-S. Hou and X.-B. Ji, *Acta Physico-Chimica Sinica*, 2017, **33**, 103-129.
3. Y. Ma, D. Zhu, H. Zhou, Y. Tang, C. Hu, X. Meng, X. Jin, T. Xu and X. Cao, *J. Alloys Compd.*, 2023, **930**.
4. Y. Ma, M. Wu, X. Jin, R. Shu, C. Hu, T. Xu, J. Li, X. Meng and X. Cao, *Chem. Eur. J.*, 2021, **27**, 12341-12351.
5. Z. Zhou, W. Luo, H. Huang, S. Huang, Y. Xia, N. Zhou and Z. He, *Ceram. Int.*, 2017, **43**, 99-105.
6. Y. Wang, S.-Z. Yang, Y. You, Z. Feng, W. Zhu, V. Garipey, J. Xia, B. Commarieu, A. Darwiche, A. Guerfi and K. Zaghib, *ACS Appl. Mater. Interfaces*, 2018, **10**, 7061-7068.
7. Z. He, Y. Jiang, J. Zhu, Y. Li, Z. Jiang, H. Zhou, W. Meng, L. Wang and L. Dai, *J. Alloys Compd.*, 2018, **731**, 32-38.
8. L. Liu, F. Tian, M. Zhou, H. Guo and X. Wang, *Electrochim. Acta*, 2012, **70**, 360-364.
9. D. Bin, Y. Wen, Y. Yuan, Y. Liu, Y. Wang, C. Wang and Y. Xia, *Electrochim. Acta*, 2019, **320**, 134555.
10. P. Liu, Y. Ren, X. Huang, Y. Dai, X. Liu, D. Sun, H. He, Y. Tang and H. Wang, *Electrochim. Acta*, 2018, **278**, 42-50.
11. W. Chen, M. Lan, D. Zhu, C. Ji, X. Feng, C. Yang, J. Zhang and L. Mi, *J. Mater. Chem. A*, 2013, **1**, 10912-10917.
